# Supplementary material
Source: PubMed Central journal article supplement (PMC5709773)

# Figure 1 source data

E

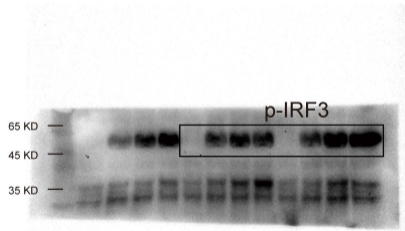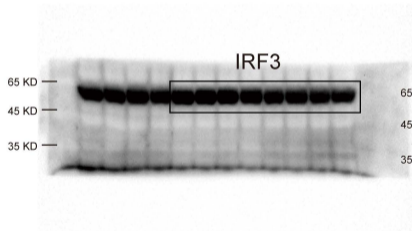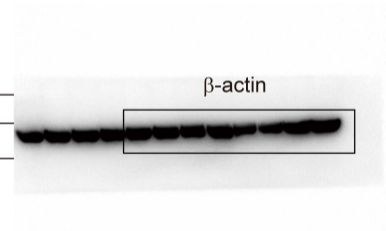

Supplement: EMBR-18-2160-s002.pdf [file EMBR-18-2160-s002.pdf]

# Figure 3 source data

## B

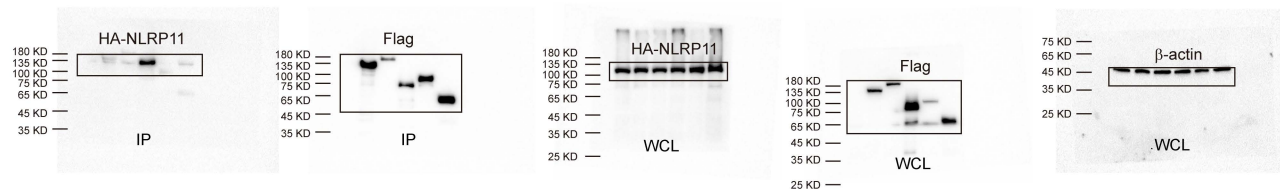

## C

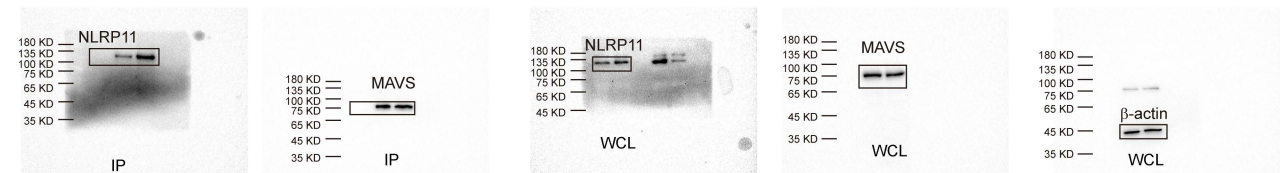

## E

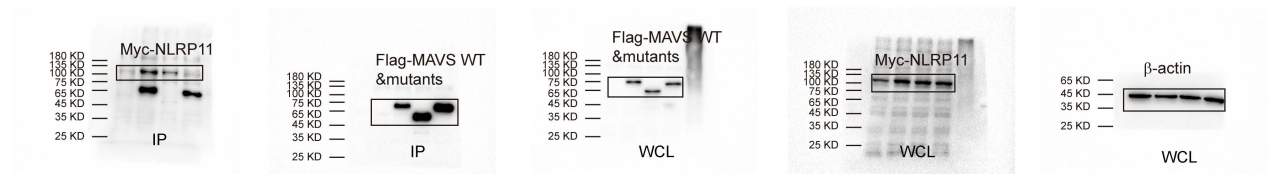

## G

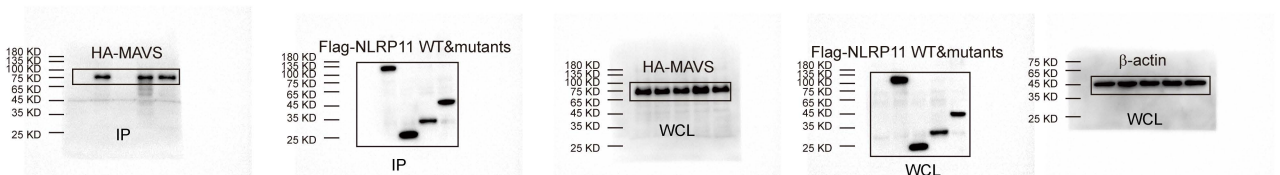

Supplement: EMBR-18-2160-s004.pdf [file EMBR-18-2160-s004.pdf]

# Figure 4 source data

**A**

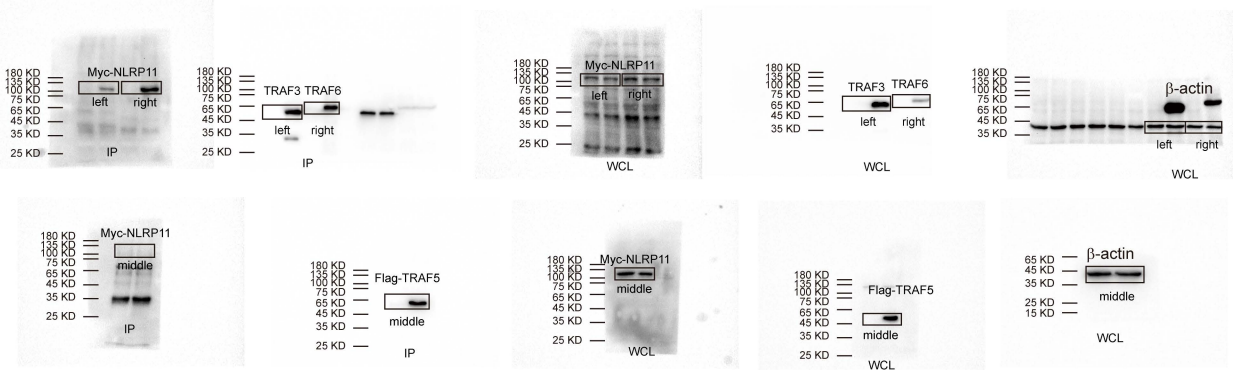

**B**

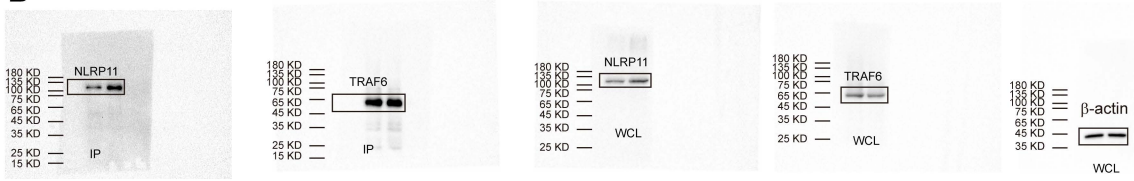

**C**

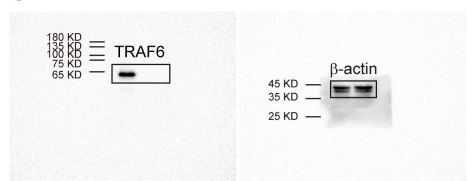

**D**

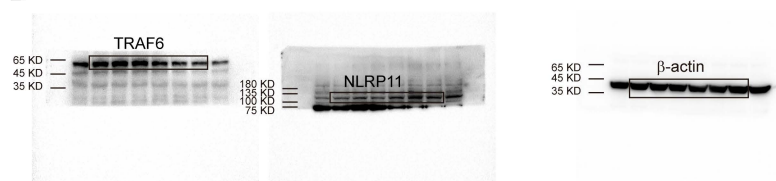

**E**

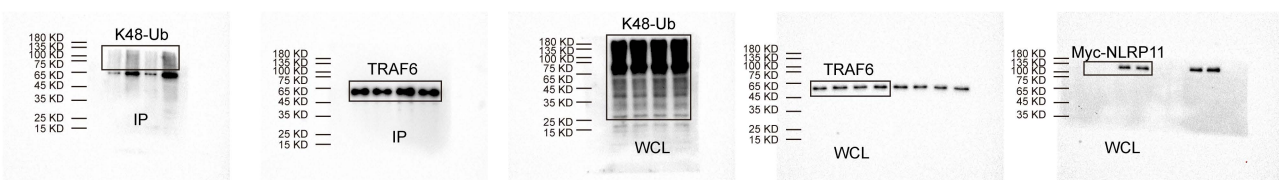

**F**

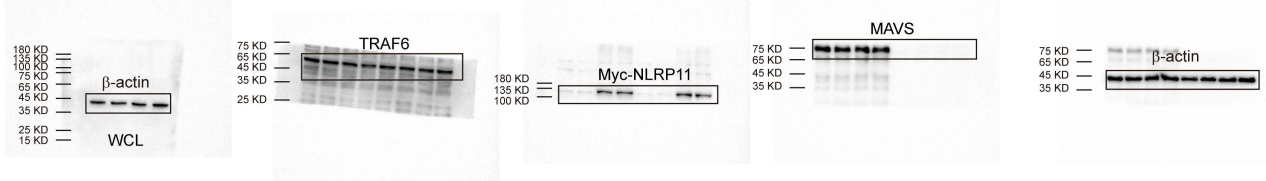

**G**

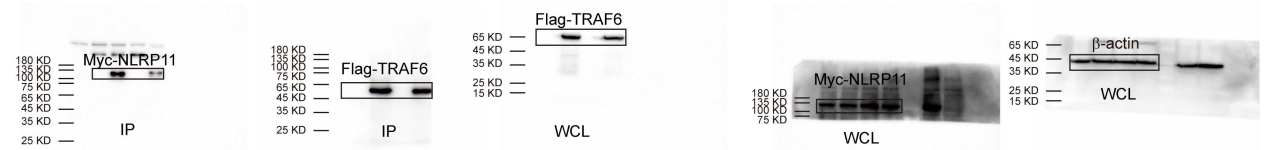

Supplement: EMBR-18-2160-s005.pdf [file EMBR-18-2160-s005.pdf]

Figure 5 source data

A

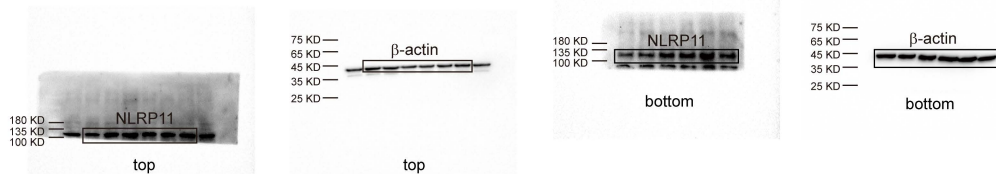

B

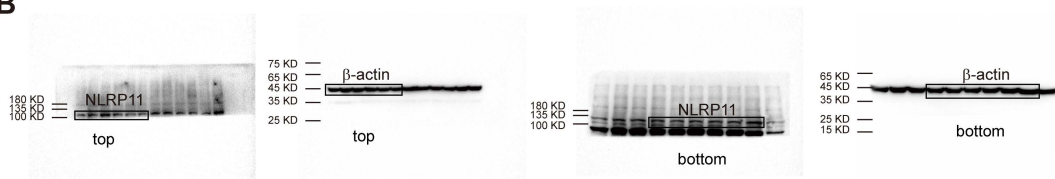

C

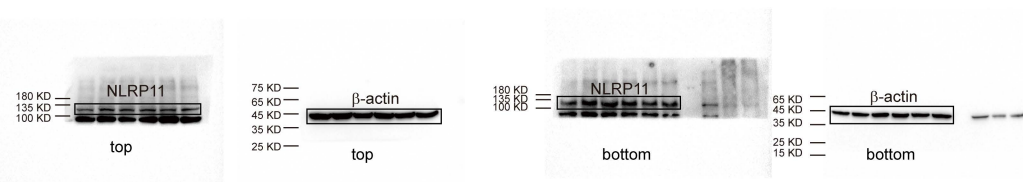

E

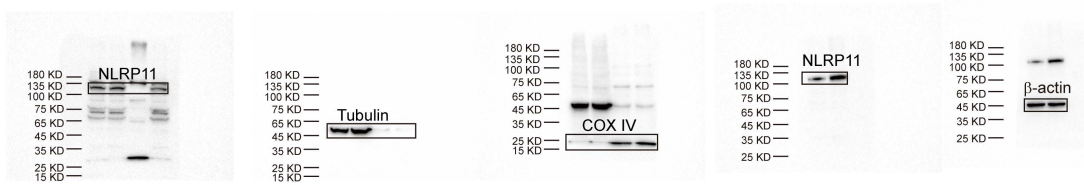

Supplement: EMBR-18-2160-s006.pdf [file EMBR-18-2160-s006.pdf]

# Figure 6 source data

## D

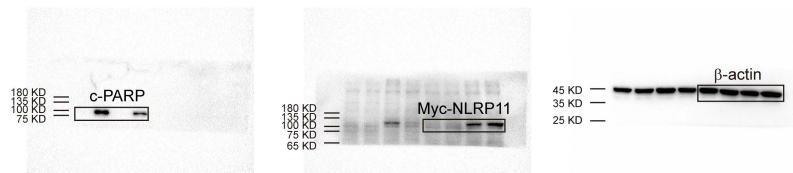

## E

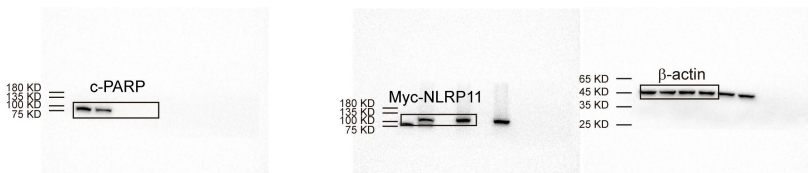

## F

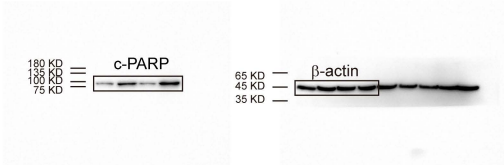

## G

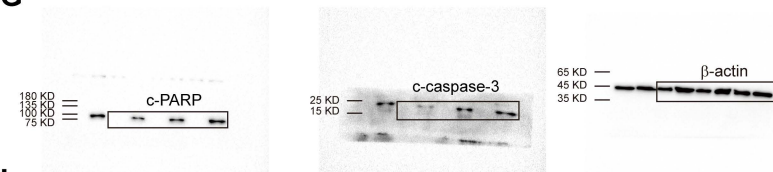

## I

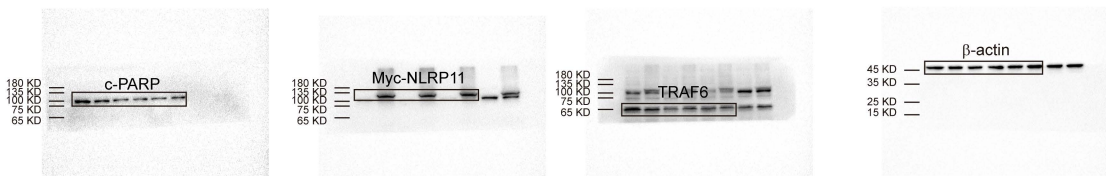

Supplement: EMBR-18-2160-s007.pdf [file EMBR-18-2160-s007.pdf]
